# Supplementary material
Source: publisher site journal article supplement (https://www.dovepress.com/article/336452)
Supplement: Supplementary file 1 [file 336452 Revised Tables S1-S5.pdf › 336452 Revised Tables S1-S5.pdf]

## Supplementary Tables

**Supplementary Table 1. Primer sequences.**

| <b>Name</b> | <b>Sequence or target sequence</b> |
|-------------|------------------------------------|
| Borealin-F  | 5'-GAAGGGCAGTAGTCGGGTG-3'          |
| Borealin-R  | 5'-TCACGGTCGAAGTCTTTCAGA-3'        |
| GAPDH-F     | 5'-ACGGATTGGTCGTATTGGGC-3'         |
| GAPDH-R     | 5'-CTCGCTCCTGGAAGATGGTGAT-3'       |

**Supplementary Table 2. Antibodies used in this study.**

| <b>Antibody</b>            | <b>WB</b> | <b>IHC</b> | <b>IF</b> | <b>Specificity</b> |                           |
|----------------------------|-----------|------------|-----------|--------------------|---------------------------|
| Borealin (#12465-1-AP)     | 1:1000    | 1:200      | 1:200     | Rabbit polyclonal  | Proteintech               |
| E-cadherin (#3195)         | 1:2000    |            |           | Rabbit monoclonal  | Cell Signaling Technology |
| Vimentin (#5741)           | 1:1000    |            |           | Rabbit monoclonal  | Cell Signaling Technology |
| Claudin-1 (#13255)         | 1:1000    |            |           | Rabbit monoclonal  | Cell Signaling Technology |
| GAPDH (#10494-1-AP)        | 1:3000    |            |           | Rabbit Polyclonal  | Proteintech               |
| $\beta$ -catenin (ab16051) | 1:1000    |            | 1:200     | Rabbit Polyclonal  | Abcam                     |
| Cyclin D1 (ab226977)       | 1/500     |            |           | Rabbit Polyclonal  | Abcam                     |
| C-myc (ab39688)            | 1/500     |            |           | Rabbit Polyclonal  | Abcam                     |
| Lamin B1 (#13435)          | 1:1000    |            |           | Rabbit monoclonal  | Cell Signaling Technology |
| Ki67 (#9449)               |           | 1:200      |           | Mouse monoclonal   | Cell Signaling Technology |
| BAX (ab32503)              |           | 1: 250     |           | Rabbit monoclonal  | Abcam                     |

**Supplementary Table 3. The top 81 differential expressed genes (DEGs).**

| DEGs   |         |         |        |          |
|--------|---------|---------|--------|----------|
| CAP2   | NXF3    | RACGAP1 | TBXA2R | CENPI    |
| STAB2  | SLITRK6 | CCNA2   | GPM6A  | FAM83D   |
| EHD3   | NPY1R   | UBE2T   | DLGAP5 | CDHR2    |
| CLEC1B | COLEC10 | PRC1    | CDCA8  | FCN3     |
| ECM1   | GPR182  | BUB1    | MARCO  | TTC36    |
| VIPR1  | CCBE1   | ITGA6   | NCAPG  | HHIP     |
| BMPER  | CFP     | CETP    | CDKN3  | ADAMTS13 |
| OIT3   | FCN2    | IGFALS  | ECT2   | ASPM     |
| CLEC4G | LRAT    | ANKRD55 | BUB1B  | TOP2A    |
| CRHBP  | LIFR    | EZH2    | STIL   | CCNB2    |
| DACH1  | PLAC8   | ANLN    | NUSAP1 | DNASE1L3 |
| CXCL14 | PLVAP   | TMEM26  | HJURP  | CENPF    |
| GDF2   | DBH     | CXCL12  | BMP5   | KIF20A   |
| CLEC4M | ANGPTL6 | ITGA9   | AURKA  |          |
| PTH1R  | FAM180A | BCO2    | PVALB  |          |
| PTTG1  | NTF3    | SLC26A6 | GNA14  |          |
| MELK   | ST6GAL2 | KIF4A   | MKI67  |          |

**Supplementary Table 4. The Cox's proportional hazards regression model analysis of 81 DEGs.**

| <b>Gene</b> | <b>Hazard.Ratio</b> | <b>X95CI</b> | <b>P.Value</b> |
|-------------|---------------------|--------------|----------------|
| STIL        | 1.09                | 0.78-1.53    | 0.619122319    |
| GNA14       | 0.43                | 0.27-0.67    | 0.00017488     |
| GDF2        | 0.8                 | 0.57-1.13    | 0.211780271    |
| PRC1        | 0.94                | 0.6-1.47     | 0.795660362    |
| CRHBP       | 0.77                | 0.61-0.97    | 0.025664214    |
| EZH2        | 1.83                | 1.45-2.31    | 2.84E-07       |
| AURKA       | 1.32                | 1.12-1.57    | 0.000956536    |
| PTTG1       | 1.41                | 1.22-1.62    | 3.17E-06       |
| VIPR1       | 0.52                | 0.32-0.85    | 0.009529733    |
| ANKRD55     | 1.19                | 0.55-2.54    | 0.65833981     |
| CXCL12      | 1.64                | 1.2-2.24     | 0.002087358    |
| DNASE1L3    | 0.71                | 0.6-0.83     | 1.93E-05       |
| FAM83D      | 1.43                | 1.2-1.71     | 7.60E-05       |
| CFP         | 0.84                | 0.62-1.15    | 0.278378256    |
| MARCO       | 1.66                | 1.22-2.26    | 0.001238036    |
| CDCA8       | 1.65                | 1.39-1.96    | 1.61E-08       |
| PVALB       | 0.94                | 0.57-1.57    | 0.818571563    |
| CLEC4G      | 0.87                | 0.7-1.08     | 0.207426352    |
| CCBE1       | 1.56                | 1.2-2.02     | 0.000788941    |
| CETP        | 0.94                | 0.64-1.4     | 0.770965925    |
| OIT3        | 0.92                | 0.77-1.09    | 0.329424765    |
| HHIP        | 0.91                | 0.55-1.52    | 0.725855637    |
| TOP2A       | 1.3                 | 1.14-1.48    | 0.000102613    |
| CCNA2       | 1.33                | 1.16-1.53    | 3.46E-05       |
| ASPM        | 1.45                | 1.19-1.76    | 0.000197086    |
| TTC36       | 1.21                | 0.99-1.48    | 0.062063093    |
| CDHR2       | 1.06                | 0.95-1.17    | 0.305942157    |
| LIFR        | 0.95                | 0.71-1.26    | 0.718016024    |
| COLEC10     | 0.74                | 0.58-0.94    | 0.015416483    |
| IGFALS      | 0.9                 | 0.81-1       | 0.041006615    |
| NUSAP1      | 1.24                | 1.06-1.45    | 0.006358684    |
| TMEM26      | 2.8                 | 0.86-9.07    | 0.086341778    |
| ECT2        | 1.5                 | 1.25-1.81    | 1.29E-05       |
| CLEC4M      | 0.82                | 0.52-1.31    | 0.409582915    |
| SLC26A6     | 1.43                | 1.14-1.78    | 0.001682798    |
| LRAT        | 1.28                | 0.72-2.28    | 0.395336578    |
| BUB1B       | 1.4                 | 0.79-2.47    | 0.248844691    |
| SLITRK6     | 0.08                | 0-2.79       | 0.162711342    |
| UBE2T       | 1.42                | 1.19-1.69    | 7.04E-05       |
| MELK        | 1.56                | 1.29-1.88    | 3.05E-06       |

|          |        |              |             |
|----------|--------|--------------|-------------|
| CLEC1B   | 1.12   | 0.96-1.32    | 0.159962293 |
| GPR182   | 0.86   | 0.77-0.95    | 0.00372672  |
| KIF4A    | 1.47   | 1.24-1.73    | 5.14E-06    |
| ADAMTS13 | 0.9    | 0.63-1.28    | 0.550869278 |
| PTH1R    | 0.76   | 0.57-1.01    | 0.060801106 |
| PLVAP    | 0.83   | 0.69-1       | 0.054603845 |
| ANLN     | 1.62   | 1.35-1.94    | 2.20E-07    |
| ANGPTL6  | 0.92   | 0.7-1.2      | 0.544201729 |
| GPM6A    | 0.77   | 0.4-1.47     | 0.42880437  |
| NCAPG    | 1.69   | 1.38-2.06    | 3.13E-07    |
| HJURP    | 1.66   | 1.37-2.02    | 2.94E-07    |
| FCN3     | 0.84   | 0.73-0.98    | 0.028999433 |
| FCN2     | 0.9    | 0.77-1.05    | 0.180557189 |
| BUB1     | 1.72   | 1.38-2.16    | 2.16E-06    |
| EHD3     | 0.92   | 0.68-1.25    | 0.59516537  |
| ST6GAL2  | 275.32 | 4.85-15619.3 | 0.006398506 |
| CAP2     | 1.04   | 0.89-1.23    | 0.616482672 |
| MKI67    | 1.48   | 1.24-1.76    | 1.62E-05    |
| NTF3     | 0.68   | 0.34-1.34    | 0.267220424 |
| DLGAP5   | 1.69   | 1.39-2.06    | 1.57E-07    |
| CENPF    | 1.46   | 1.21-1.75    | 5.48E-05    |
| NXF3     | 0.52   | 0.1-2.74     | 0.441230102 |
| NPY1R    | 2.13   | 1.4-3.26     | 0.000456768 |
| DACH1    | 1.85   | 0.68-5.02    | 0.226921099 |
| STAB2    | 1.55   | 1.18-2.05    | 0.001925381 |
| DBH      | 0.82   | 0.66-1.03    | 0.082234373 |
| RACGAP1  | 1.59   | 1.3-1.95     | 5.87E-06    |
| CDKN3    | 1.3    | 1.11-1.53    | 0.000944652 |
| ECM1     | 1.02   | 0.84-1.24    | 0.82134985  |
| CENPI    | 2.15   | 1.56-2.97    | 3.48E-06    |
| PLAC8    | 1.25   | 0.95-1.64    | 0.108264323 |
| ITGA9    | 0.98   | 0.76-1.26    | 0.856756498 |
| BMPER    | 0.86   | 0.4-1.85     | 0.699332688 |
| CCNB2    | 1.36   | 1.15-1.61    | 0.00038898  |
| FAM180A  | 1.19   | 0.92-1.52    | 0.179878081 |
| CXCL14   | 0.92   | 0.79-1.07    | 0.287852559 |
| ITGA6    | 1.11   | 0.92-1.35    | 0.276097968 |
| TBXA2R   | 1.1    | 0.75-1.61    | 0.634832714 |
| BMP5     | 0.85   | 0.46-1.57    | 0.598462996 |
| BCO2     | 0.84   | 0.65-1.09    | 0.183262447 |
| KIF20A   | 1.68   | 1.39-2.01    | 3.65E-08    |

---

**Supplementary Table 5. The Kaplan-Meier method analysis of 81 DEGs**

| <b>Gene</b> | <b>P.Value</b> |
|-------------|----------------|
| KIF20A      | 0.001000851    |
| BCO2        | 0.142758054    |
| BMP5        | 0.378524165    |
| TBXA2R      | 0.843408482    |
| ITGA6       | 0.481041631    |
| CXCL14      | 0.943506221    |
| FAM180A     | 0.203615563    |
| CCNB2       | 0.045808749    |
| BMPER       | 0.216409925    |
| ITGA9       | 0.398094054    |
| PLAC8       | 0.15473574     |
| CENPI       | 0.005918544    |
| ECM1        | 0.956967149    |
| CDKN3       | 0.076630313    |
| RACGAP1     | 0.000494733    |
| DBH         | 0.076334902    |
| STAB2       | 0.069381646    |
| DACH1       | 0.039695185    |
| NPY1R       | 0.001332647    |
| NXF3        | 0.589690491    |
| CENPF       | 0.003881948    |
| DLGAP5      | 0.001656399    |
| NTF3        | 0.019403636    |
| MKI67       | 0.013236604    |
| CAP2        | 0.147903319    |
| ST6GAL2     | 0.002158322    |
| EHD3        | 0.422981521    |
| BUB1        | 0.000904282    |
| FCN2        | 0.078829744    |
| FCN3        | 0.040031719    |
| HJURP       | 0.000488403    |
| NCAPG       | 0.004214009    |
| GPM6A       | 0.028113462    |
| ANGPTL6     | 0.18242289     |
| ANLN        | 0.000350759    |
| PLVAP       | 0.042821731    |
| PTH1R       | 0.200503028    |
| ADAMTS13    | 0.96716659     |
| KIF4A       | 0.003116398    |
| GPR182      | 0.000421636    |
| CLEC1B      | 0.287847666    |

|          |             |
|----------|-------------|
| MELK     | 0.001761222 |
| UBE2T    | 0.010520233 |
| SLITRK6  | 0.949538986 |
| BUB1B    | 0.542654564 |
| LRAT     | 0.671632382 |
| SLC26A6  | 0.006890423 |
| CLEC4M   | 0.662350138 |
| ECT2     | 0.001417385 |
| TMEM26   | 0.526218208 |
| NUSAP1   | 0.006785759 |
| IGFALS   | 0.005372179 |
| COLEC10  | 0.026066014 |
| LIFR     | 0.367378588 |
| CDHR2    | 0.336035217 |
| TTC36    | 0.149729845 |
| ASPM     | 0.001069078 |
| CCNA2    | 0.006271972 |
| TOP2A    | 0.0006734   |
| HHIP     | 0.833811367 |
| OIT3     | 0.304048502 |
| CETP     | 0.902171495 |
| CCBE1    | 0.001859691 |
| CLEC4G   | 0.618110611 |
| PVALB    | 0.03878043  |
| CDCA8    | 8.52E-06    |
| MARCO    | 0.000314751 |
| CFP      | 0.272386086 |
| FAM83D   | 0.010560294 |
| DNASE1L3 | 2.21E-06    |
| CXCL12   | 0.094085993 |
| ANKRD55  | 0.926296464 |
| VIPR1    | 0.013306865 |
| PTTG1    | 0.0009186   |
| AURKA    | 0.002936903 |
| EZH2     | 2.37E-05    |
| CRHBP    | 0.014184877 |
| PRC1     | 0.957989624 |
| GDF2     | 0.792838595 |
| GNA14    | 0.001679474 |
| STIL     | 0.457358526 |

---
